# Supplementary material for: Achieving NIR Light-Mediated Tumor-Specific Fenton Reaction-Assisted Oncotherapy by Using Magnetic Nanoclusters
Source: Frontiers journal article supplement (doi:10.3389/fonc.2021.777295), 2021-10-25
Supplement: Data_Sheet_1.pdf [file Data_Sheet_1.pdf]

*Supporting Information for*

# Achieving NIR Light-Mediated Tumor-Specific Fenton Reaction-Assisted Oncotherapy by Using Magnetic Nanoclusters

*Shaoyou Qin,<sup>†</sup> Jinru Xue,<sup>‡</sup> Erna Jia,<sup>†</sup> Na Ren,<sup>‡</sup> Yongqiang Dong,<sup>§</sup> and Changyu Zhou <sup>\*,†</sup>*

<sup>†</sup> Department of Gastroenterology and Hepatology, China-Japan Union Hospital of Jilin University, Jilin University, Changchun 130033, P.R. China

<sup>‡</sup> Department of Thoracic Surgery, China-Japan Union Hospital of Jilin University, Jilin University, Changchun 130033, P.R. China

<sup>§</sup> Department of Thyroid Surgery, First Affiliated Hospital of Zhengzhou University, Zhengzhou 450052, P.R. China.

E-mail: cyzhou@jlu.edu.cn

**Table S1.** Mean value of hemolysis percentages after co-incubation with MNCs.

| concentrations ( $\mu\text{g/mL}$ ) | average value of hemolysis (%) |
|-------------------------------------|--------------------------------|
| 0.9% NaCl                           | 0                              |
| D.I. water                          | 100                            |
| 3.125                               | 0.198                          |
| 6.25                                | 0.198                          |
| 12.5                                | 0.396                          |
| 25                                  | 0.495                          |
| 50                                  | 0.594                          |
| 100                                 | 0.693                          |
| 200                                 | 0.792                          |
| 400                                 | 1.188                          |
